# Supplementary material for: 2D group-VA fluorinated antimonene: synthesis and saturable absorption
Source: Royal Society of Chemistry journal article supplement (doi:10.1039/c8nr07894g), 2018-12-20
Supplement: c8nr07894g1.pdf [file c8nr07894g1.pdf]

Electronic Supplementary Information

**2D group-VA fluorinated antimonene: synthesis and saturable  
absorption**

Guangju Zhang<sup>‡a</sup>, Xian Tang<sup>‡b</sup>, Xing Fu<sup>a</sup>, Weicheng Chen<sup>c</sup>, Babar Shabbir<sup>d</sup>, Han  
Zhang<sup>\*b</sup>, Qiang Liu<sup>\*a</sup> and Mali Gong<sup>\*a</sup>

<sup>a</sup> Center for Photonics and Electronics, Department of Precision Instruments,  
Tsinghua University, Beijing 100084, China.

E-mail: qiangliu@mail.tsinghua.edu.cn, gongml@mail.tsinghua.edu.cn

<sup>b</sup> Shenzhen Engineering Laboratory of Phosphorene and Optoelectronics,  
Collaborative Innovation Center for Optoelectronics Science and Technology, and  
Key Laboratory of Optoelectronics Devices and Systems of Ministry of Education  
and Guangdong Province, Shenzhen University, Shenzhen 518060, China.

E-mail: hzhang@szu.edu.cn.

<sup>c</sup> School of Physics and Optoelectronic Engineering, Foshan University, Foshan  
528000, China

<sup>d</sup> Department of Materials Science and Engineering, and ARC Centre of Excellence in  
Future Low-Energy Electronics Technologies (FLEET), Monash University, Clayton,  
VIC 3800, Australia

<sup>‡</sup>These authors contribute equally to this work.

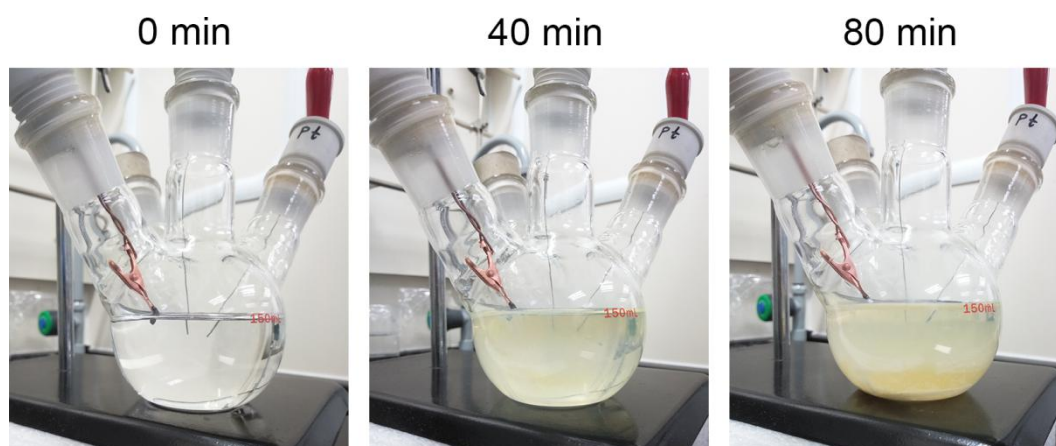

**Figure S1.** Snapshots of the room temperature ionic liquid-assisted electrochemical exfoliation and synchronous fluorination process of Sb in 0.15 M [BMIM][PF<sub>6</sub>]/MeCN electrolyte. The electrolyte is discolored from transparent to light yellow. White precipitates are exfoliated from the anodic Sb.

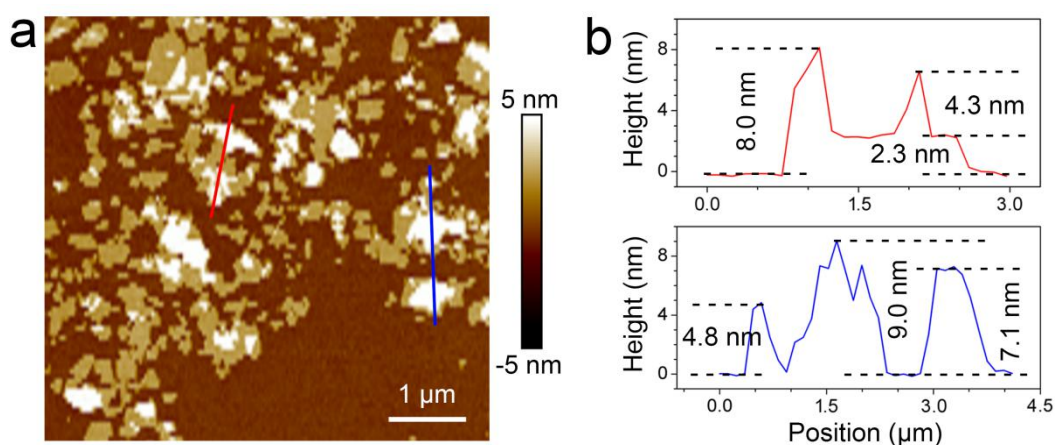

**Figure S2.** (a) Large-area AFM topographic image of the synthesized FA. The white color terrace regions confirm the existence of the stacking of FA nanosheets. (b) Height profiles of FA in the positions denoted by the red and blue solid lines in (a).

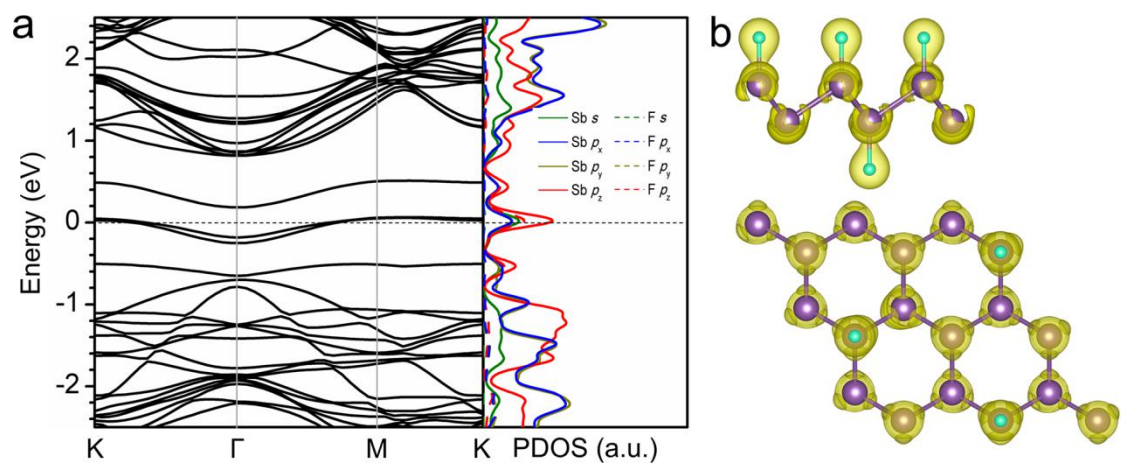

**Figure S3.** (a) Energy spectrum, (b) PDOS, and (c) charge density distribution of Sb18F4 with F atoms adsorbed on two sides. Sb (F) atoms are presented by purple (light blue) balls.

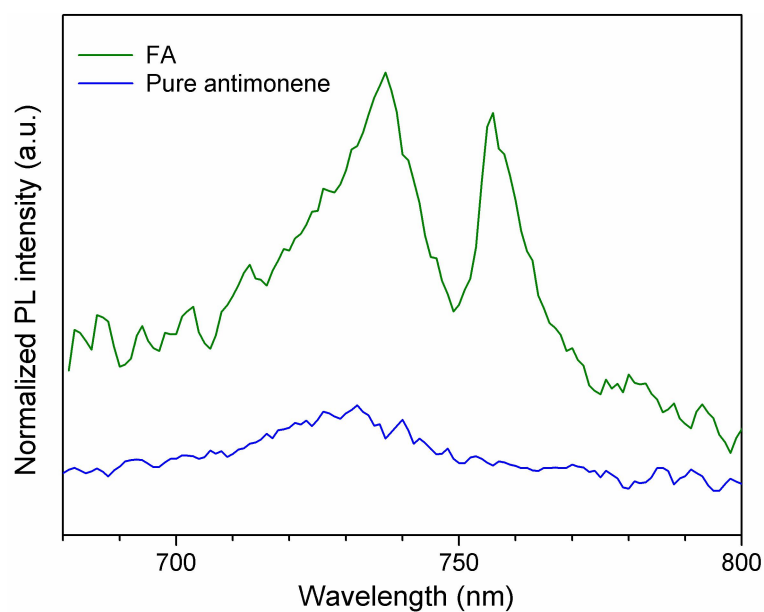

**Figure S4.** Photoluminescence spectra of fluorinated and pure antimonene excited by a 532 nm laser.
